# Supplementary material for: Geomorphic imprint of high mountain floods: Insight from the 2022 hydrological extreme across the Upper Indus terrain in NW Himalayas
Source: Copernicus journal article supplement (doi:10.5194/egusphere-2024-1618), 2024-06-18
Supplement: Supplementary file 1 [file egusphere-2024-1618-supplement.pdf]

## Supplementary Figures:

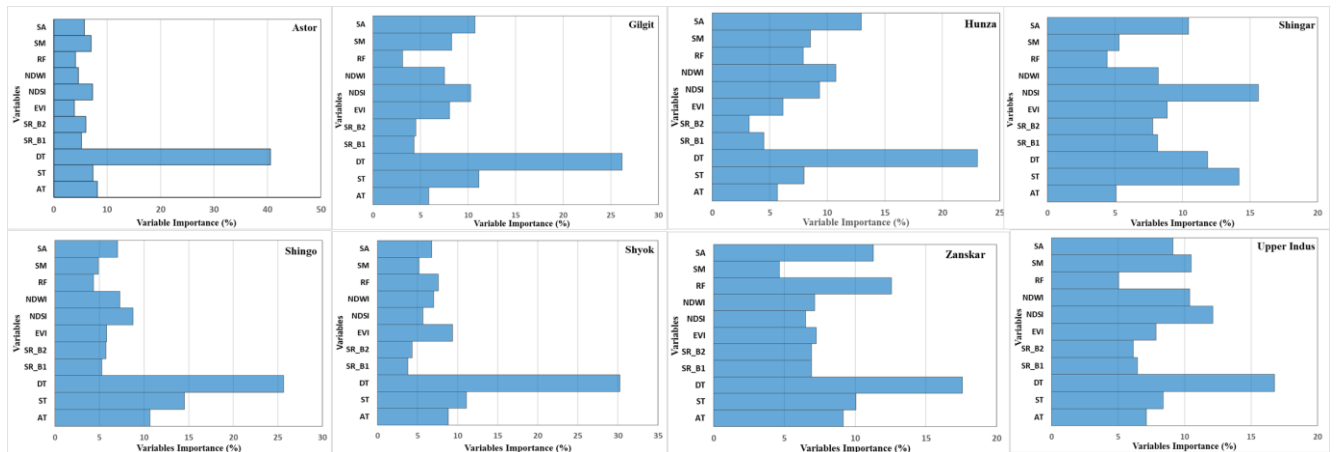

Fig.S1. Random Forest-Regression based variables importance for quantifying anomalous precipitation from July 1 to August 31, 2022 across Upper Indus catchment as well as along all the major tributaries:

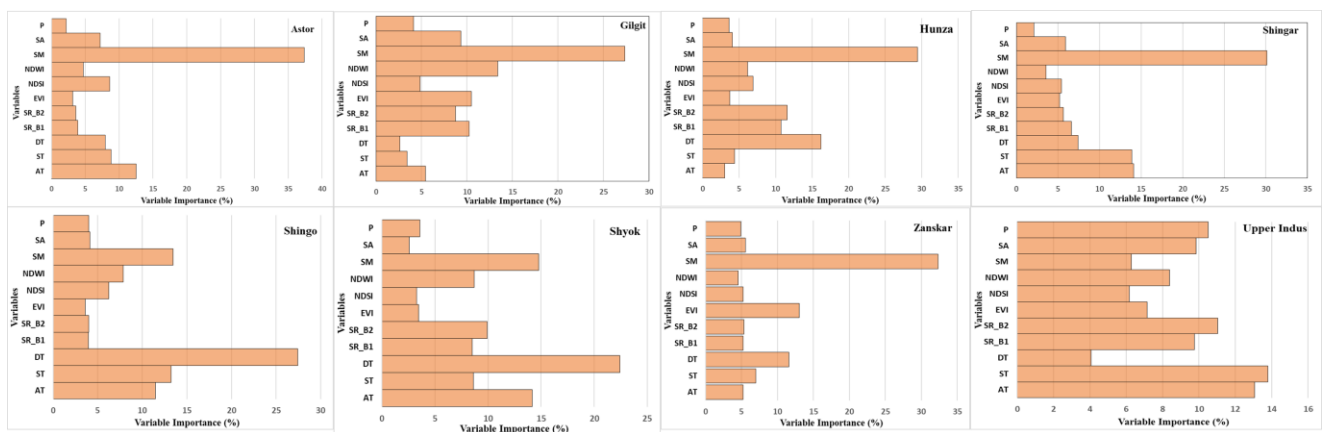

Fig.S2. Random Forest-Regression based variables importance for quantifying anomalous runoff from July 1 to August 31, 2022 across Upper Indus catchment as well as along all the major tributaries:
